# Supplementary material for: The easy synthesis of new N-substituted 5-oxindoline-rhodanines and their sensing ability: the recognition of acetate ions in aqueous solution
Source: Royal Society of Chemistry journal article supplement (doi:10.1039/c9nj01732a), 2019-01-01
Supplement: c9nj01732a1.pdf [file c9nj01732a1.pdf]

## Supplementary Data for

# The easy synthesis of new *N*-substitute 5-oxindoline-rhodanines and sensing ability: *The recognition of acetate ions in aqueous solution*

Sinan Bayindir\* and Kemal Yazarlı

Department of Chemistry, Faculty of Sciences and Arts, Bingol University, Bingol,  
Turkey

E-mail: sbayindir@bingol.edu.tr

### Contents

|                                                                                                                                                                                                                                                           |       |
|-----------------------------------------------------------------------------------------------------------------------------------------------------------------------------------------------------------------------------------------------------------|-------|
| Colorimetric screening of <b>5-OxI-Rh</b> (A and D), <b>5a</b> (B and E) and <b>5e</b> (C) (5 μM) in CH <sub>3</sub> CN or in CH <sub>3</sub> CN/H <sub>2</sub> O (v/v: 1/1) with the presence of 10 equiv. of anions                                     | 2     |
| UV-vis spectrums of <b>5a</b> (5 μM) in CH <sub>3</sub> CN ( <b>A</b> ) and CH <sub>3</sub> CN /H <sub>2</sub> O (v/v:1/1, <b>B</b> ) with various anions                                                                                                 | 3     |
| UV-vis spectrum of <b>5-OxI-Rh</b> and <b>5-OxI-Rh</b> -HEPES (5 μM in CH <sub>3</sub> CN/H <sub>2</sub> O (v/v: 1/1).                                                                                                                                    | 4     |
| UV-vis titration of <b>5-OxI-Rh</b> (5 μM) with the increasing concentration of [Bu <sub>4</sub> N]BnO <sup>-</sup> in CH <sub>3</sub> CN/H <sub>2</sub> O (v/v: 1/1).                                                                                    | 5     |
| Fluorescence titration of <b>5-OxI-Rh</b> (5 μM) with the increasing concentration of [Bu <sub>4</sub> N]BnO <sup>-</sup> in CH <sub>3</sub> CN/H <sub>2</sub> O (v/v: 1/1).                                                                              | 6     |
| LC-MS (ESI) spectrum of [ <b>5-OxI-Rh-AcO<sup>-</sup></b> ] complex.                                                                                                                                                                                      | 7     |
| Benesi-Hildebrand plot based on a 1:1 association stoichiometry between <b>5-OxI-Rh</b> and BnO <sup>-</sup> , and the change fluorescence intensity of <b>5-OxI-Rh</b> with the increasing concentration of BnO <sup>-</sup> (λ <sub>exc</sub> =386 nm). | 8     |
| Fluorescence spectra of <b>5-OxI-Rh</b> (5 μM) + [[Bu <sub>4</sub> N]AcO] (30 μM) at different pH (2–12)                                                                                                                                                  | 9     |
| The NMR spectrums of <b>5-OxI-Rh</b> and <b>5a-5h</b>                                                                                                                                                                                                     | 10-18 |

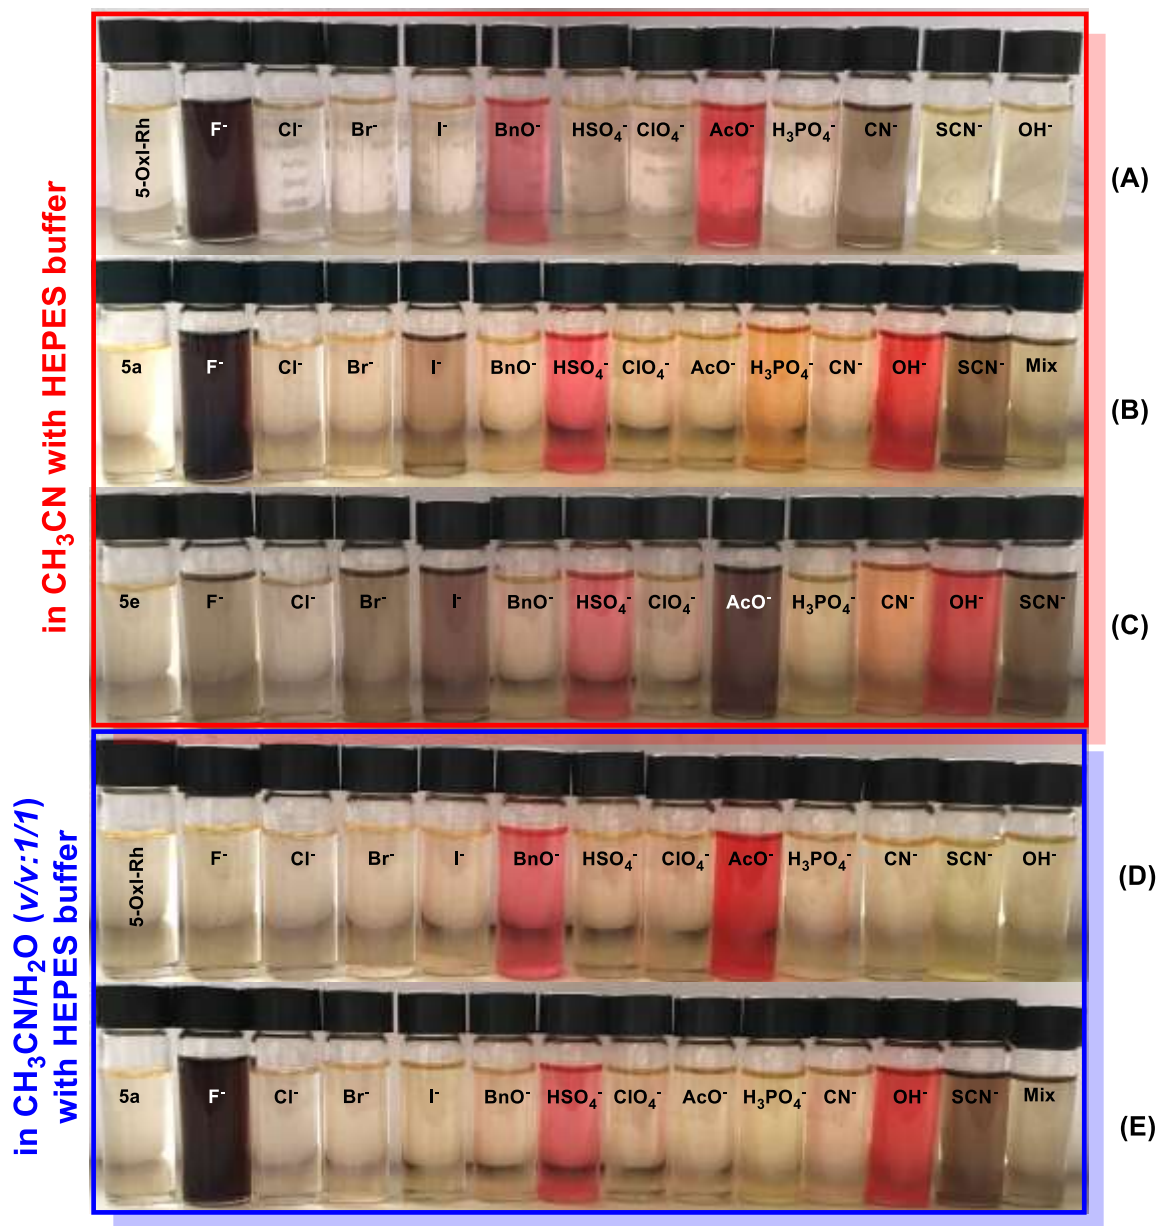

**Fig. S1.** Colorimetric screening of **5-OxI-Rh** (A and D), **5a** (B and E) and **5e** (C) (5  $\mu$ M) in CH<sub>3</sub>CN or in CH<sub>3</sub>CN/H<sub>2</sub>O (v/v: 1/1) with the presence of 10 equiv. of anions.

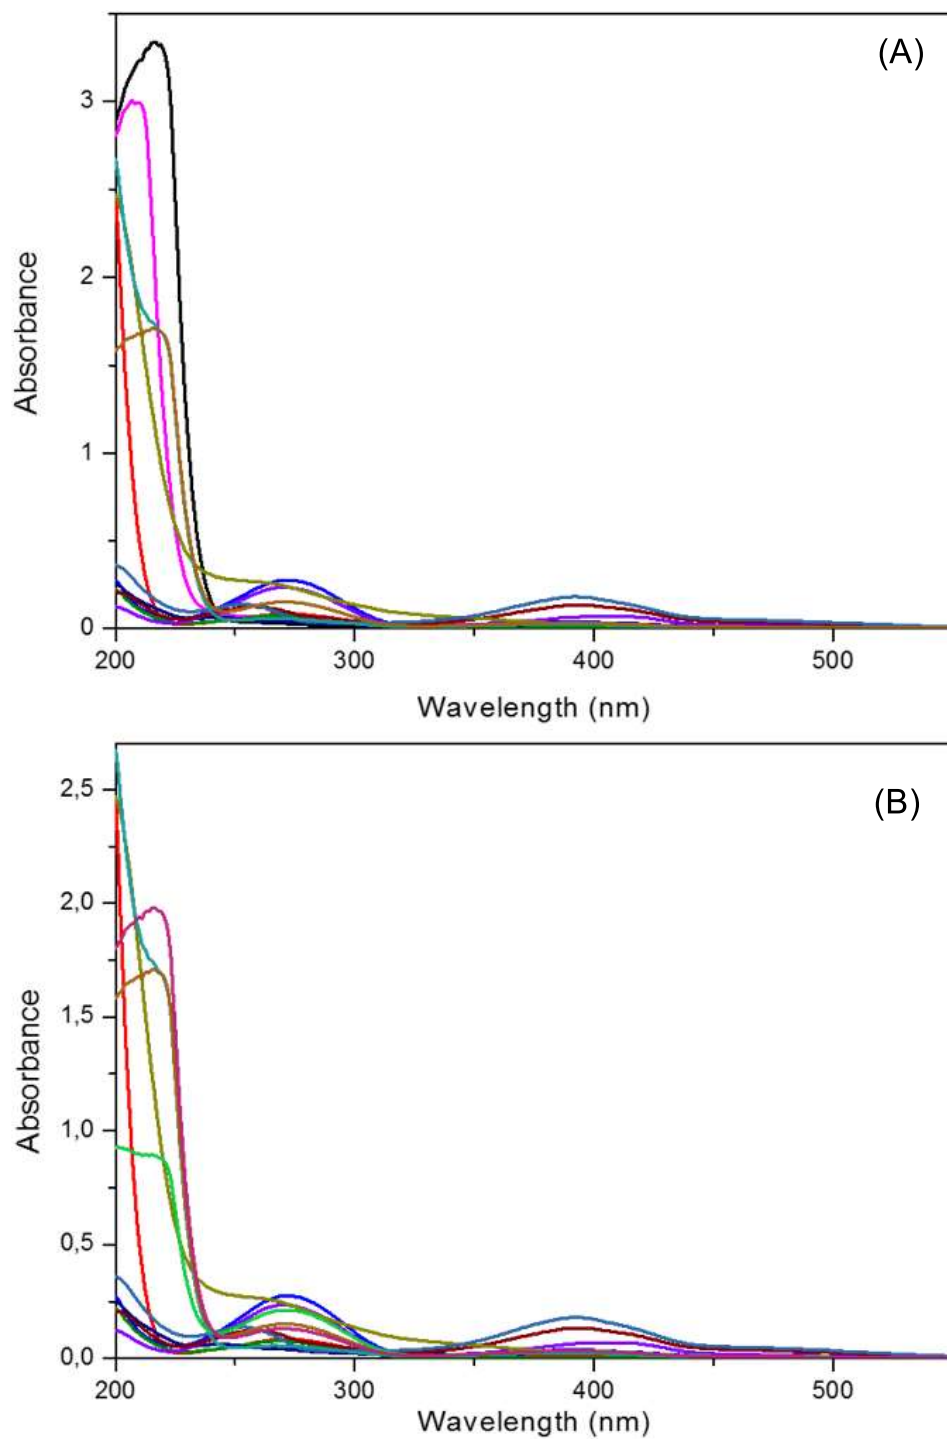

**Fig. S2.** UV-vis spectrums of **5a** (5  $\mu$ M) in  $\text{CH}_3\text{CN}$  (**A**) and  $\text{CH}_3\text{CN}/\text{H}_2\text{O}$  (v/v:1/1, **B**) with various anions

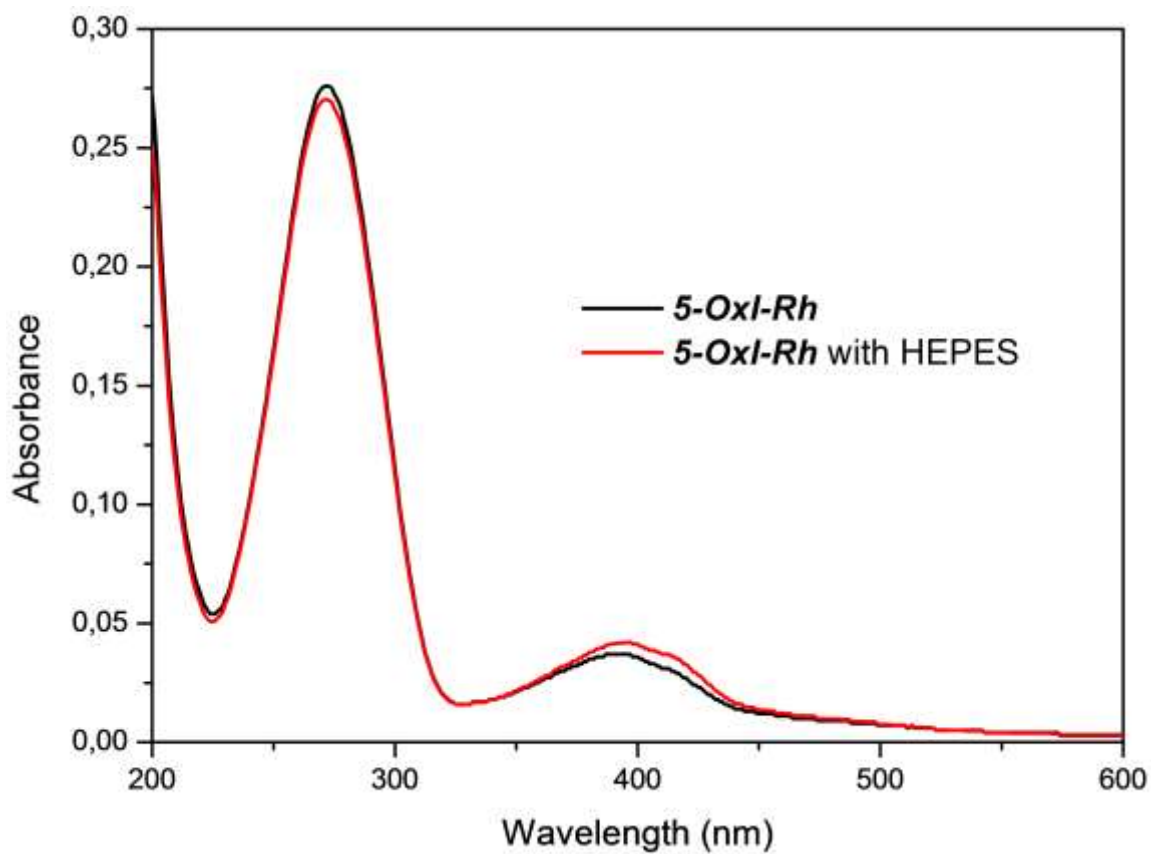

**Fig. S3.** UV-vis spectrum of *5-OxI-Rh* and *5-OxI-Rh*-HEPES (5  $\mu$ M in CH<sub>3</sub>CN/H<sub>2</sub>O (v/v: 1/1)).

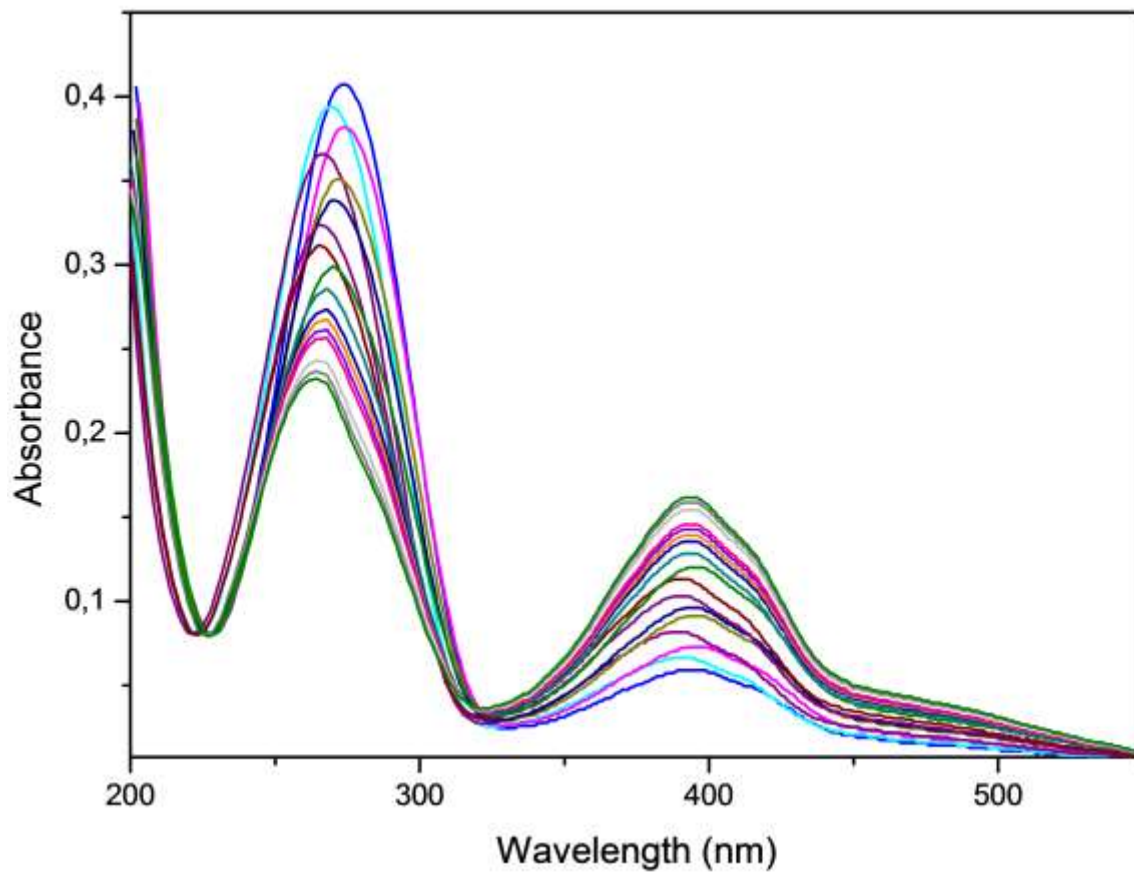

**Fig. S4.** UV-vis titration of *5-OxI-Rh* (5 μM) with the increasing concentration of [Bu<sub>4</sub>N]BnO in CH<sub>3</sub>CN/H<sub>2</sub>O (v/v: 1/1).

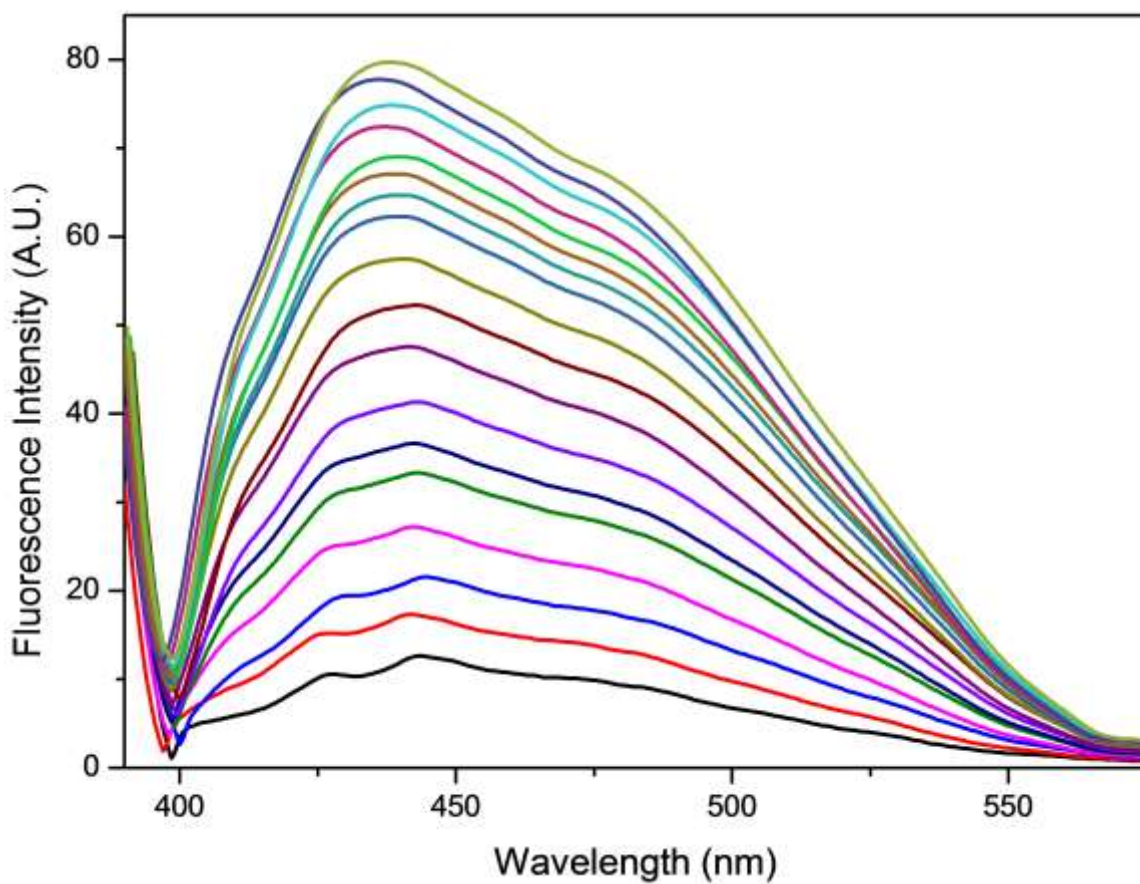

**Fig. S5.** Fluorescence titration of *5-OxI-Rh* (5  $\mu\text{M}$ ) with the increasing concentration of  $[\text{Bu}_4\text{N}]\text{BnO}$  in  $\text{CH}_3\text{CN}/\text{H}_2\text{O}$  (v/v: 1/1).

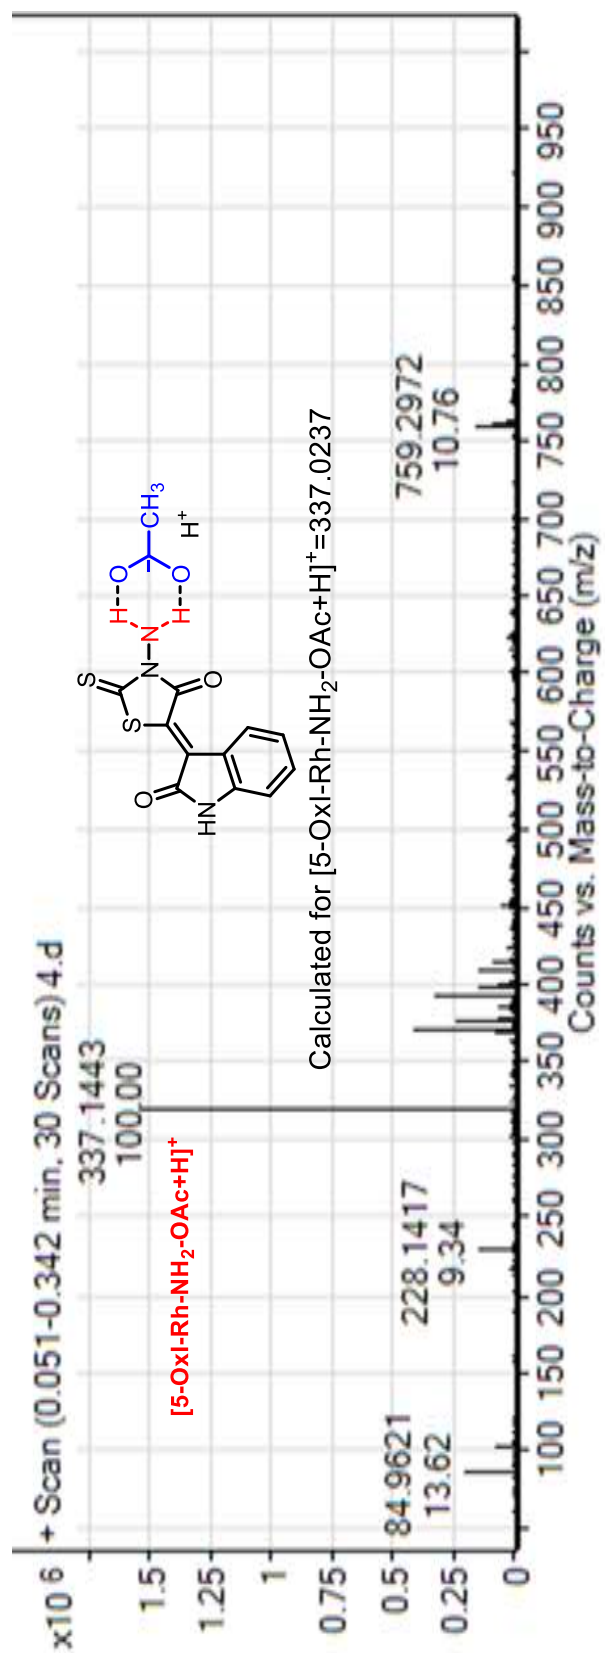

**Fig. S6.** LC-MS (ESI) spectrum of [5-OxI-Rh-AcO<sup>-</sup>] complex.

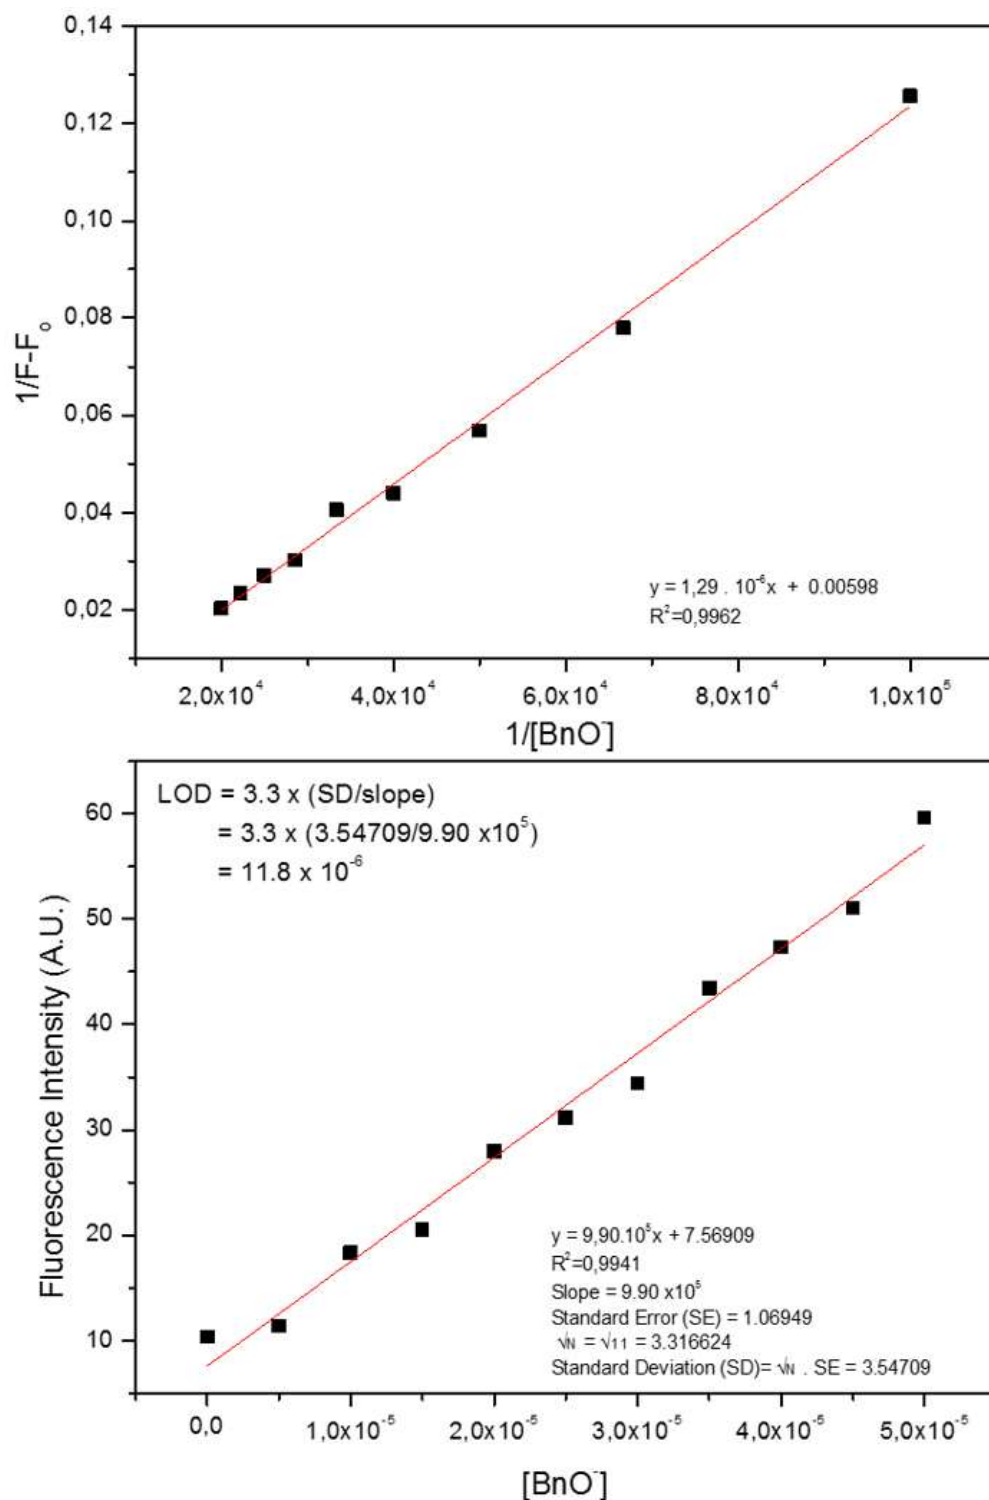

**Fig. S7.** Benesi-Hildebrand plot based on a 1:1 association stoichiometry between *5-OxI-Rh* and BnO<sup>-</sup>, and the change fluorescence intensity of *5-OxI-Rh* with the increasing concentration of BnO<sup>-</sup> ( $\lambda_{exc}=386$  nm).



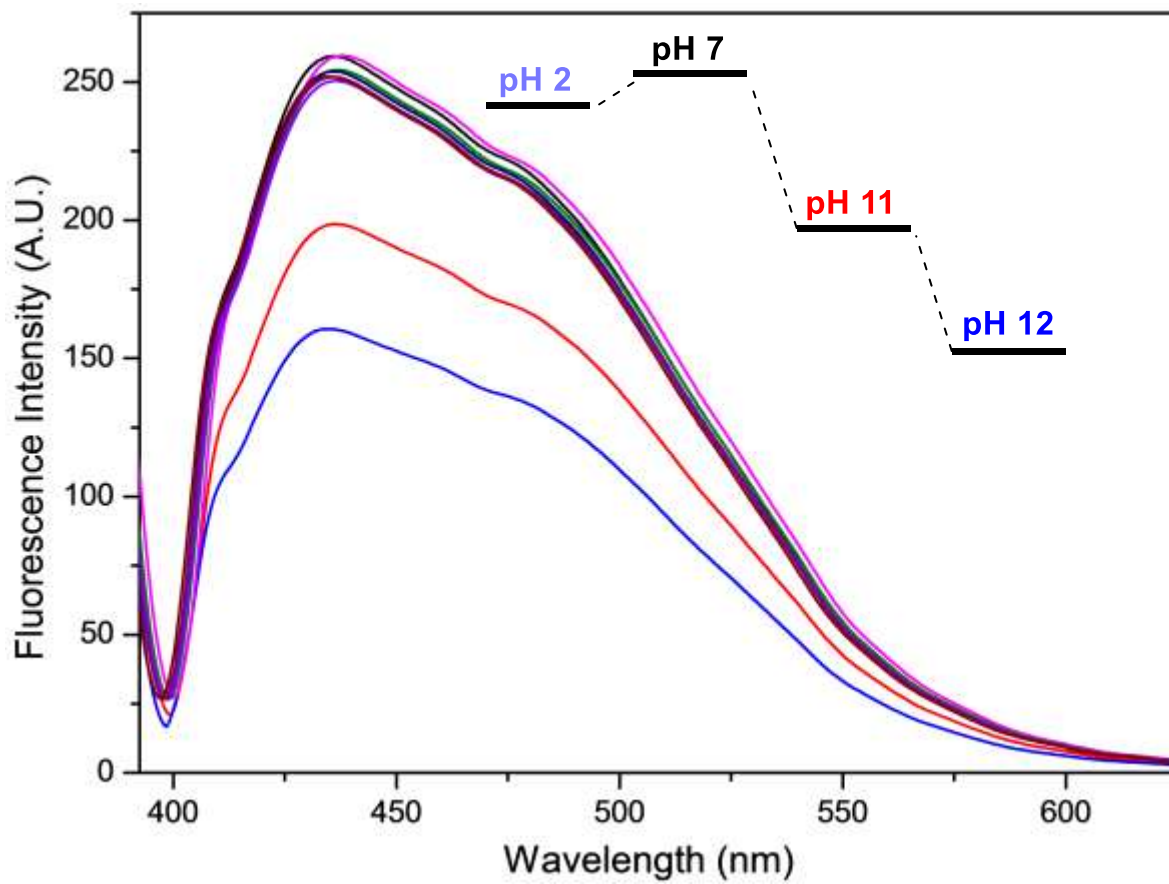

**Fig. S8.** Fluorescence spectra of *5-OxI-Rh* (5 μM) + [Bu<sub>4</sub>N]AcO (30 μM) at different pH (2–12)

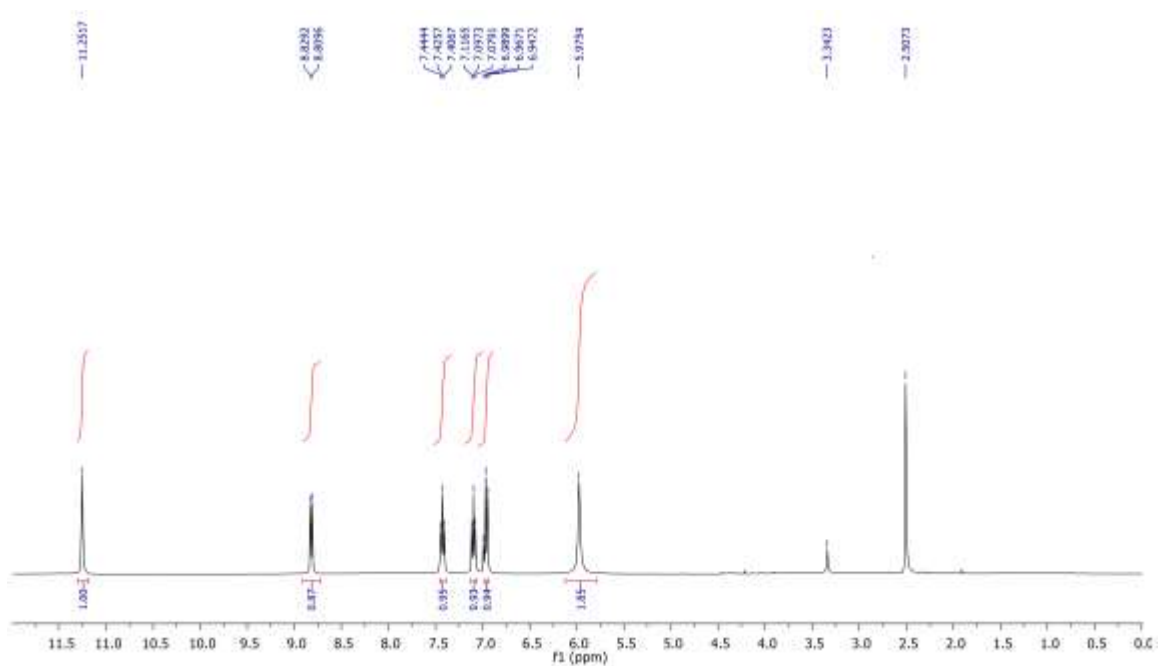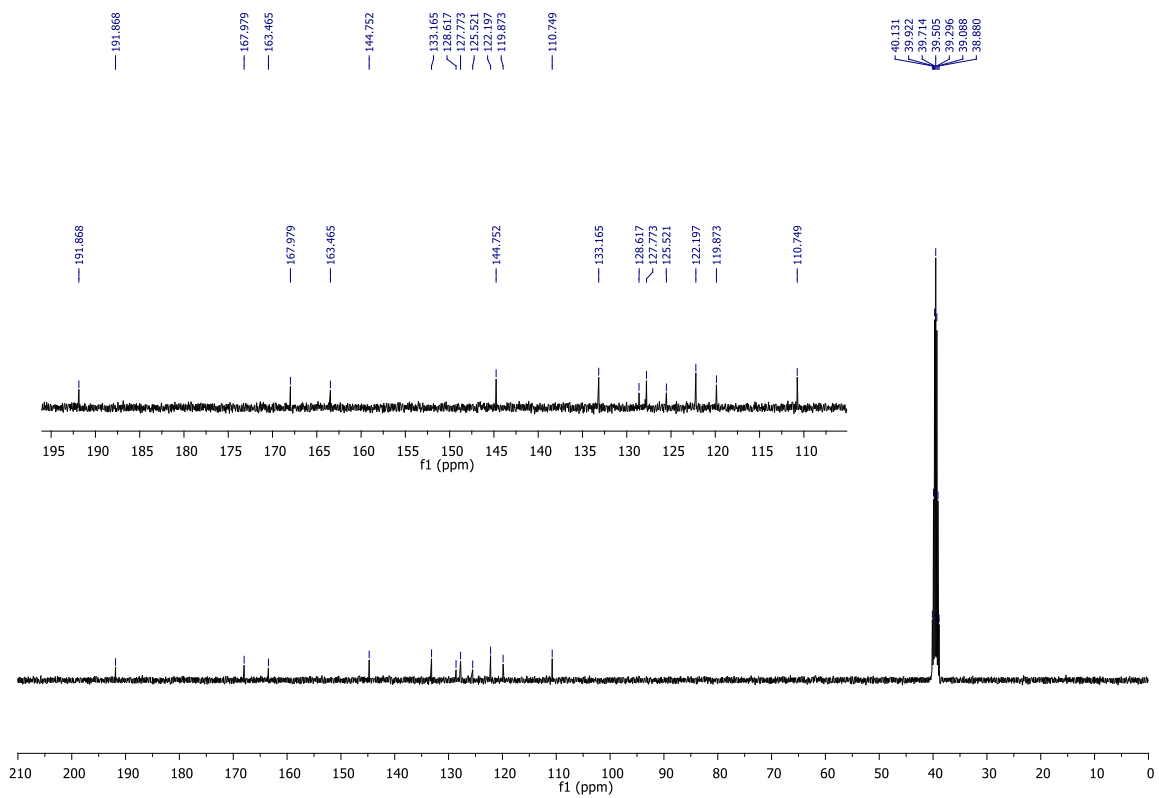

**Fig. S9.** <sup>1</sup>H-NMR (400 MHz) and <sup>13</sup>C-NMR (100 MHz) spectra of *5-OxI-Rh* in DMSO-d<sub>6</sub>.

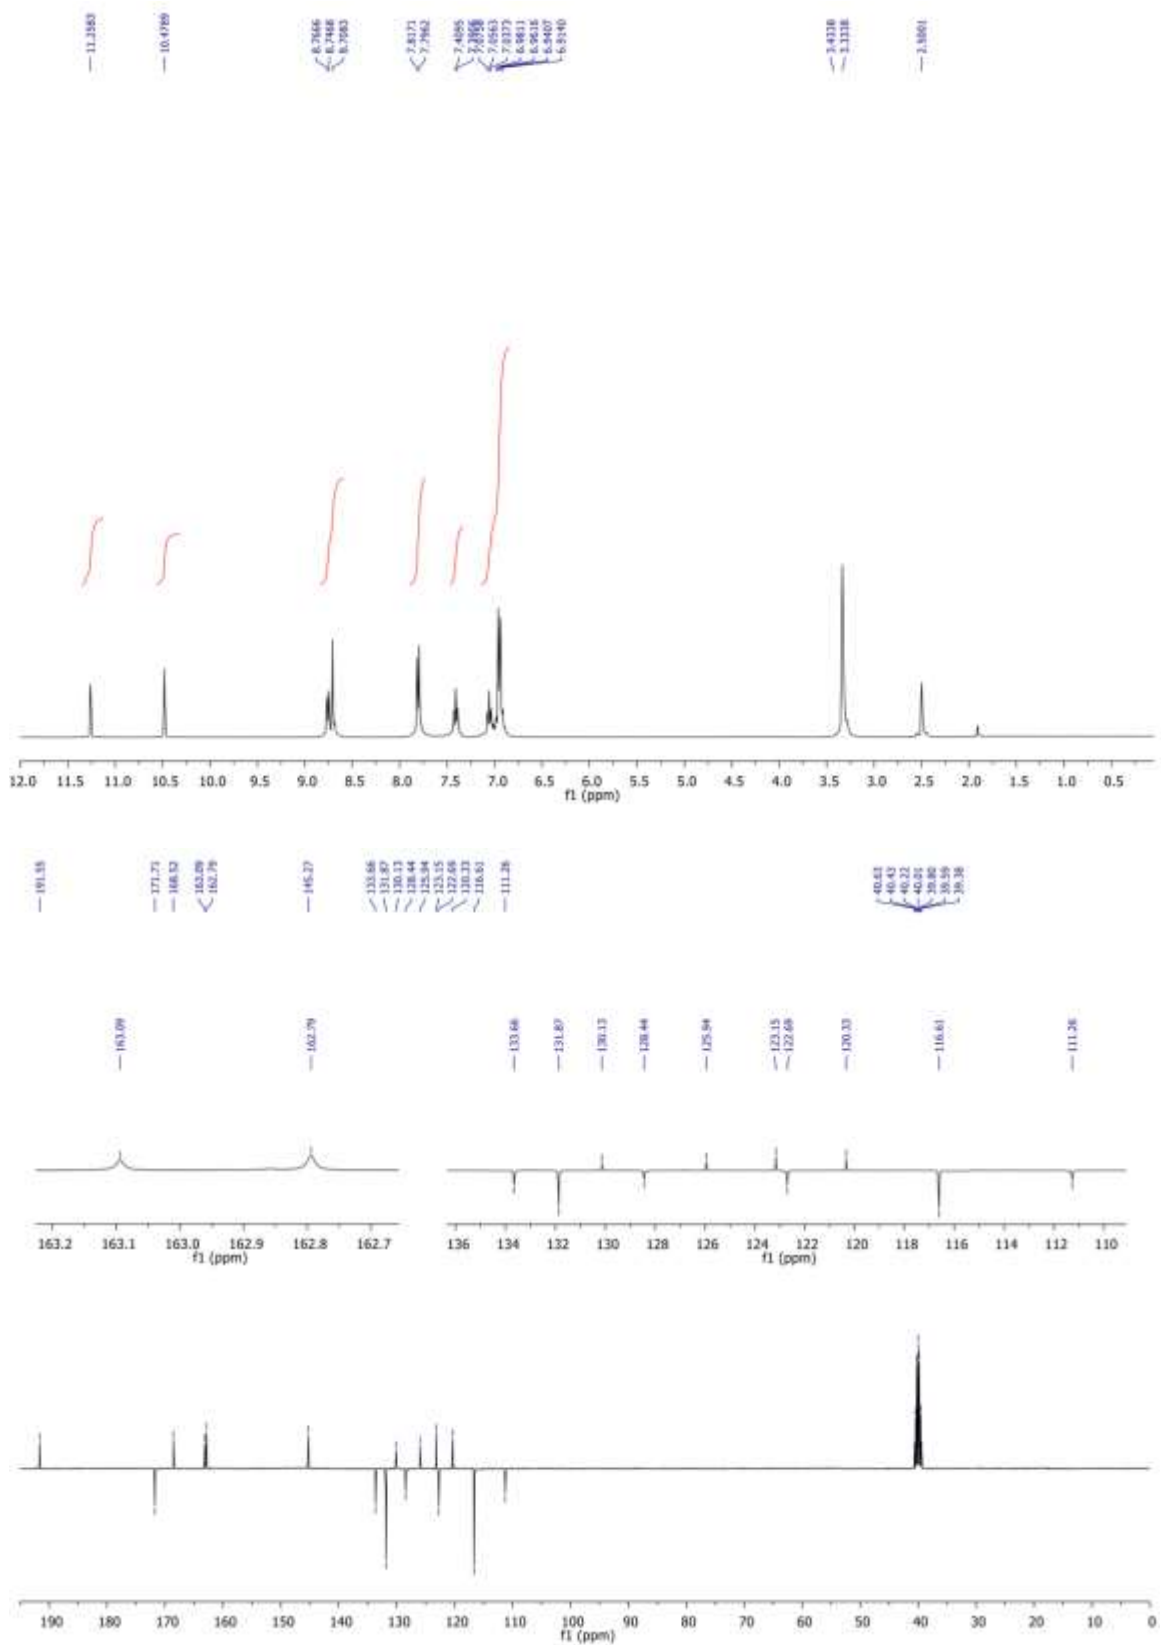

**Fig. S10.**  $^1\text{H-NMR}$  (400 MHz) and  $^{13}\text{C-NMR}$  (100 MHz) spectrums of **5a** in  $\text{DMSO-d}_6$ .

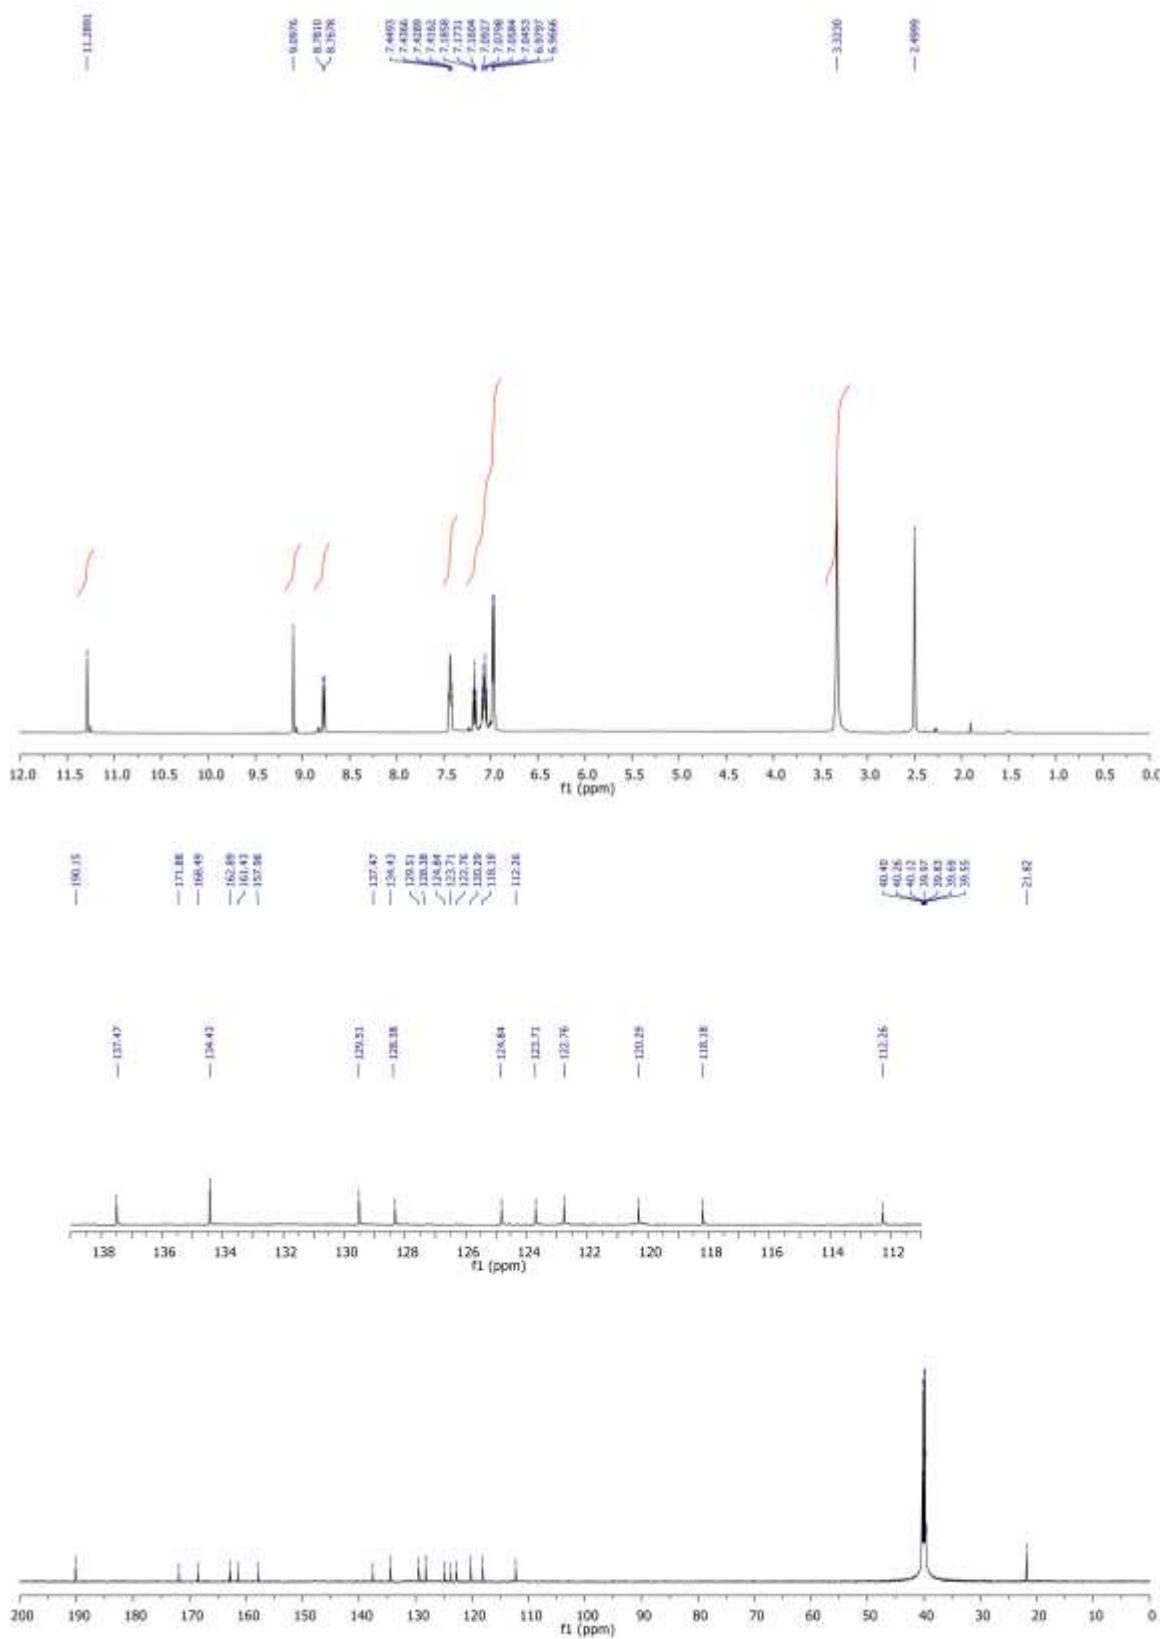

**Fig. S11.** <sup>1</sup>H-NMR (600 MHz) and <sup>13</sup>C-NMR (150 MHz) spectrums of **5b** in DMSO-d<sub>6</sub>.

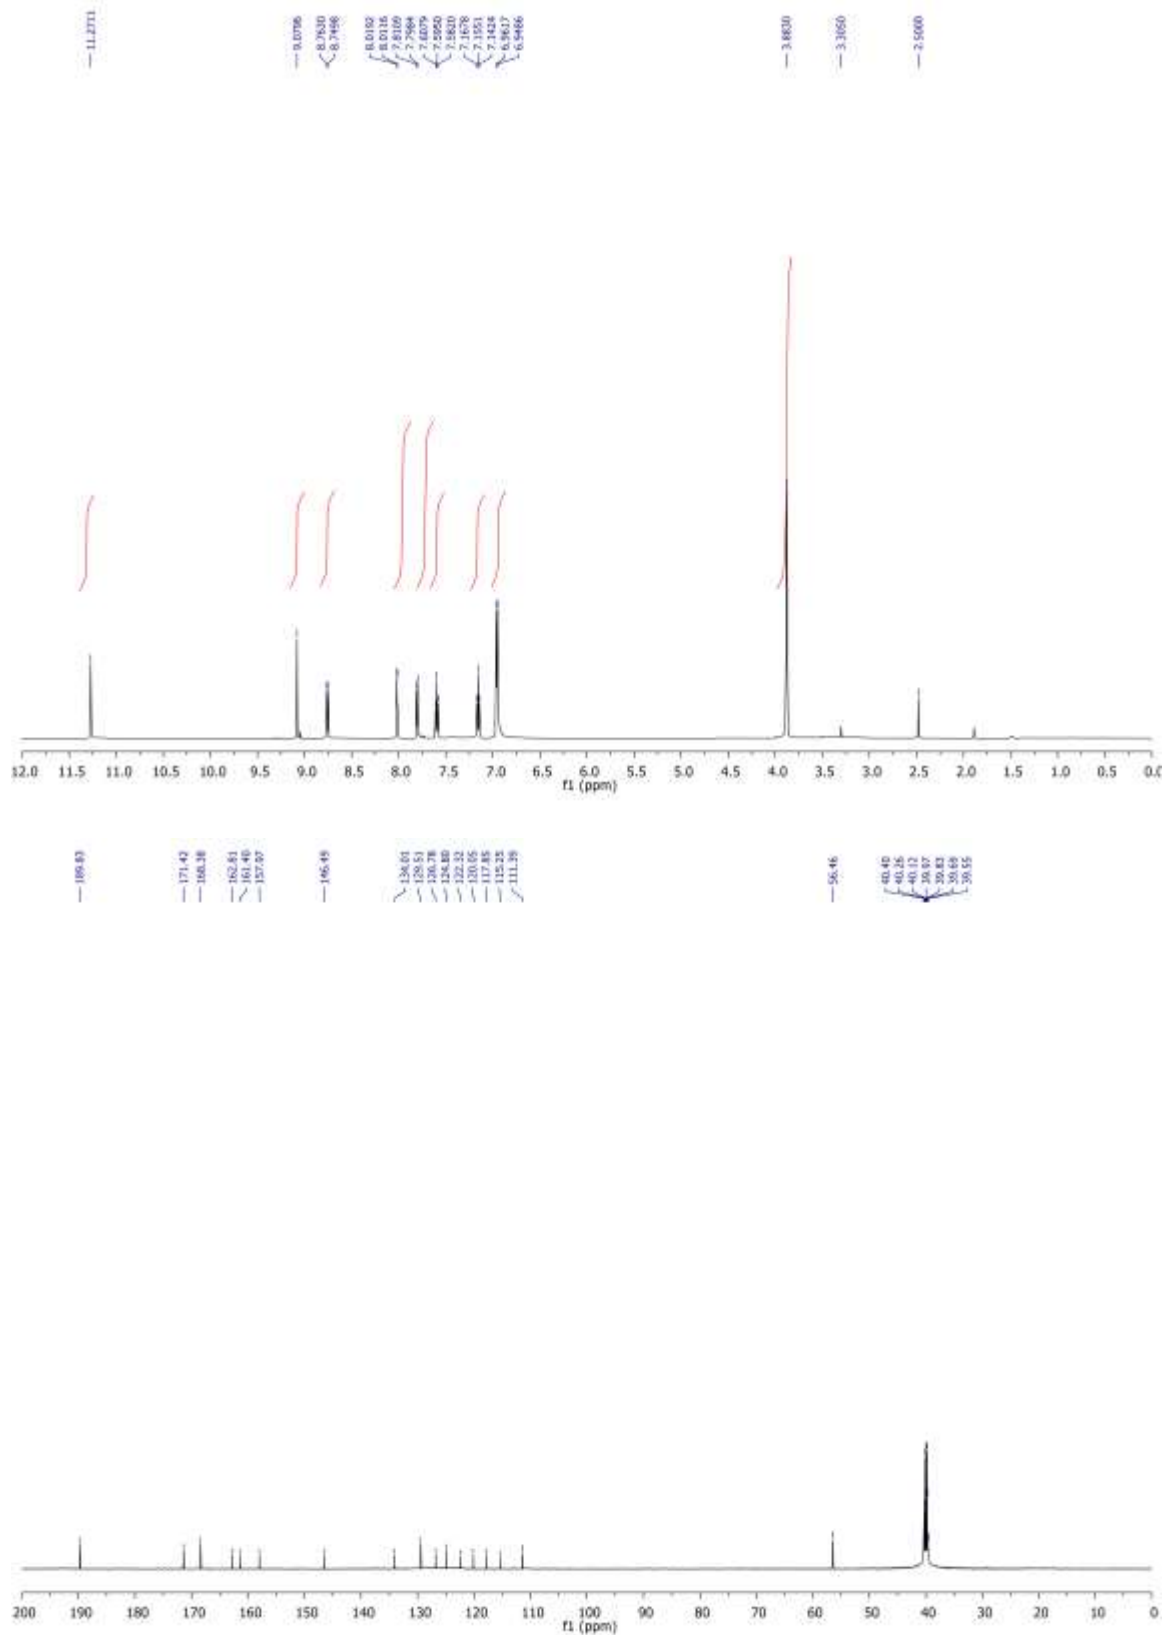

**Fig. S12.**  $^1\text{H-NMR}$  (600 MHz) and  $^{13}\text{C-NMR}$  (150 MHz) spectra of **5c** in  $\text{DMSO-d}_6$ .

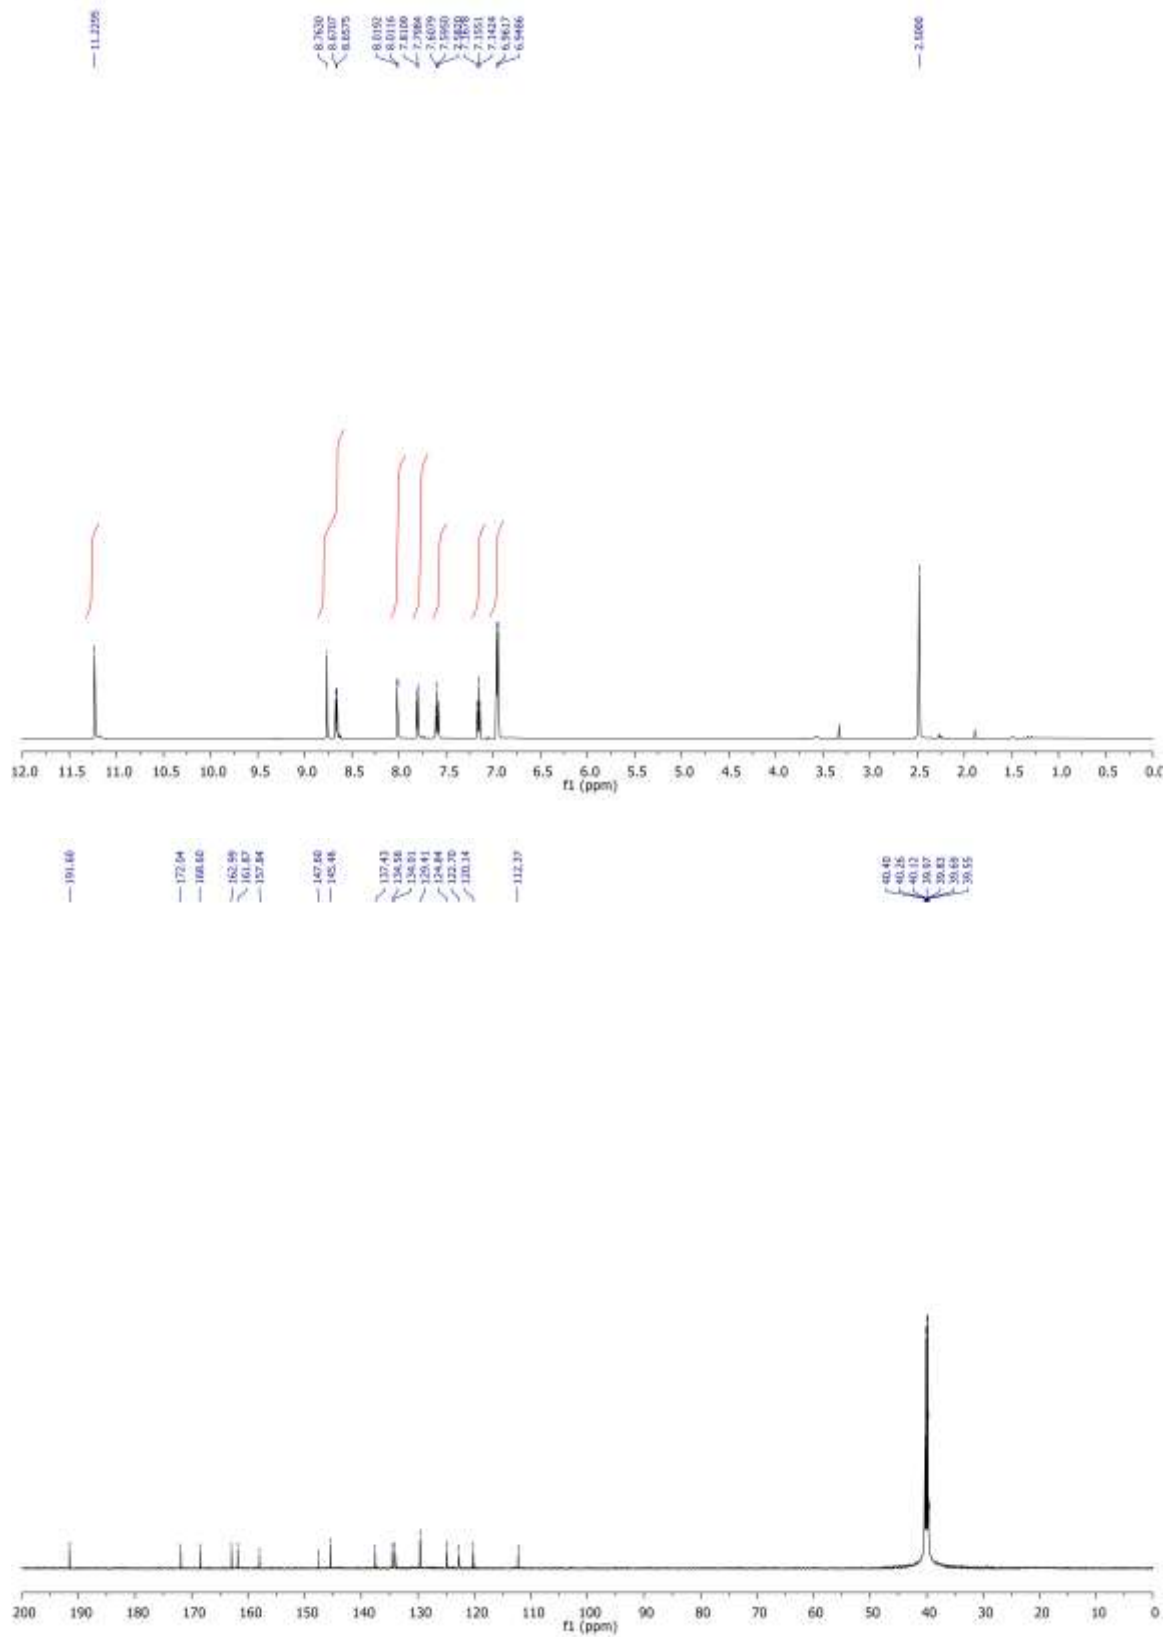

**Fig. S13.**  $^1\text{H-NMR}$  (600 MHz) and  $^{13}\text{C-NMR}$  (150 MHz) spectrums of **5d** in DMSO- $d_6$ .



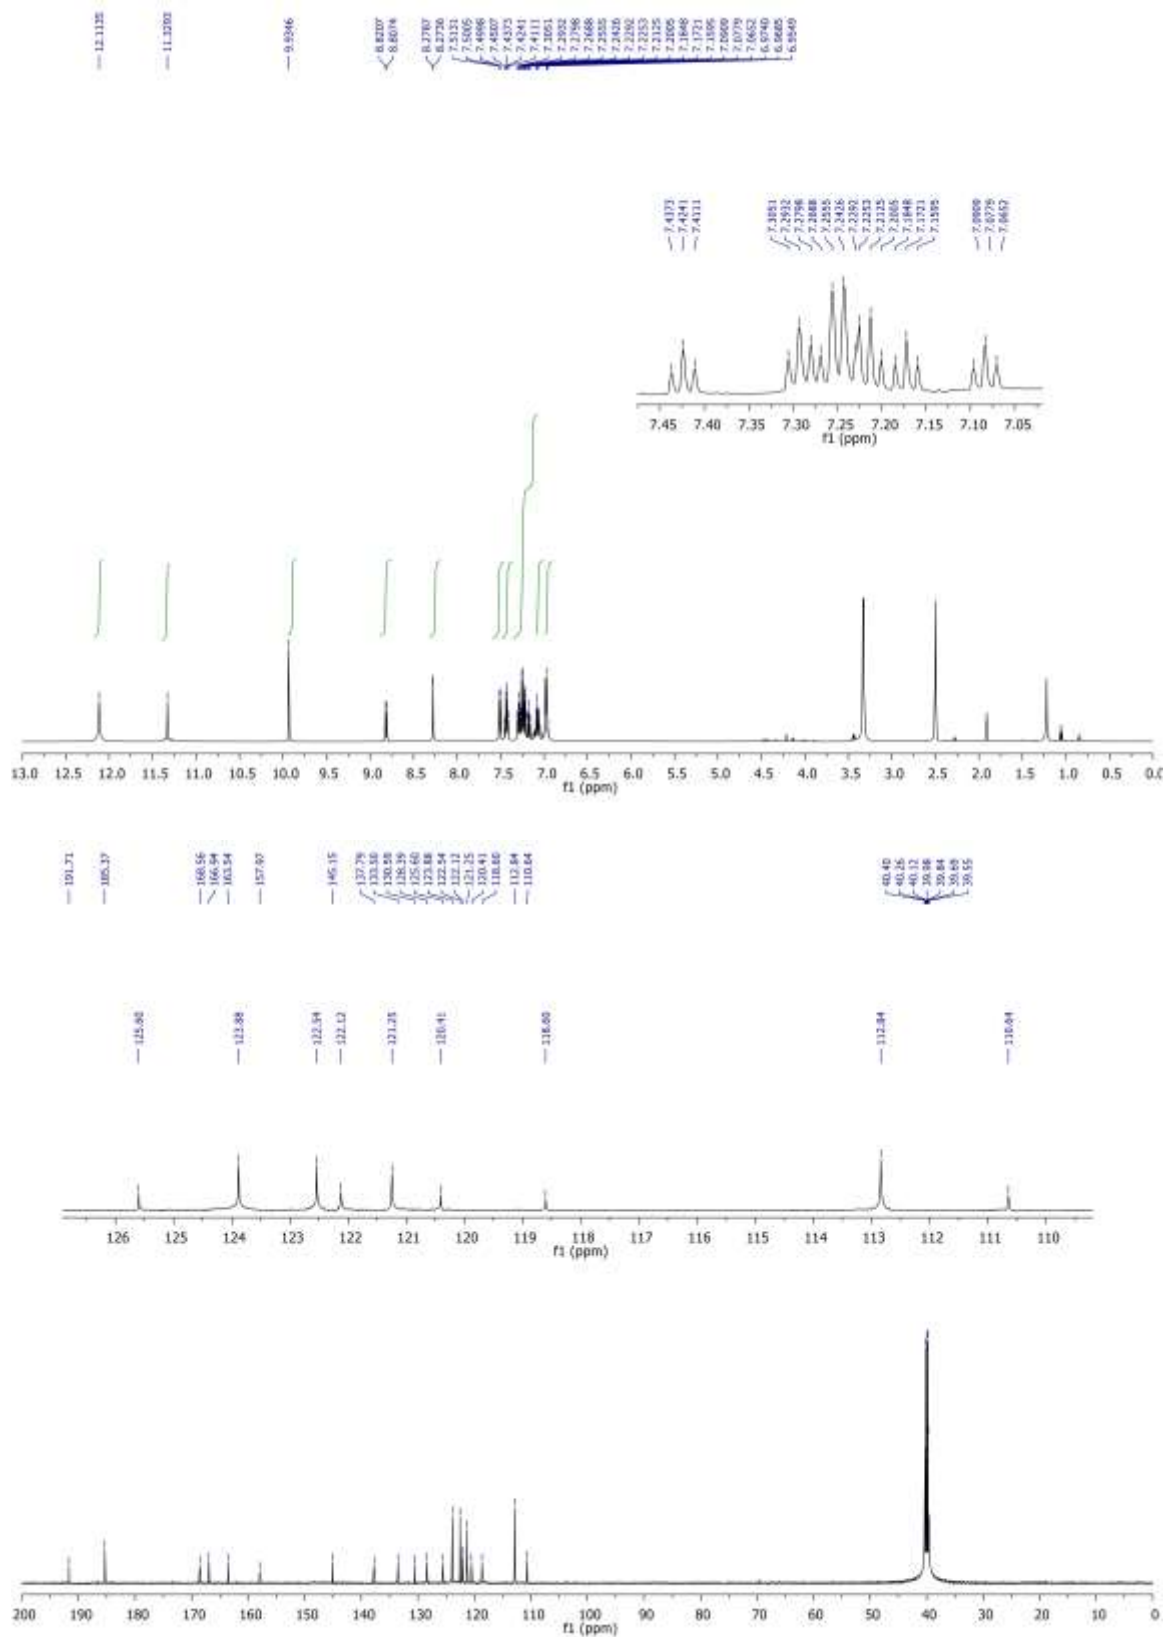

**Fig. S15.**  $^1\text{H-NMR}$  (600 MHz) and  $^{13}\text{C-NMR}$  (150 MHz) spectra of **5f** in  $\text{DMSO-d}_6$ .



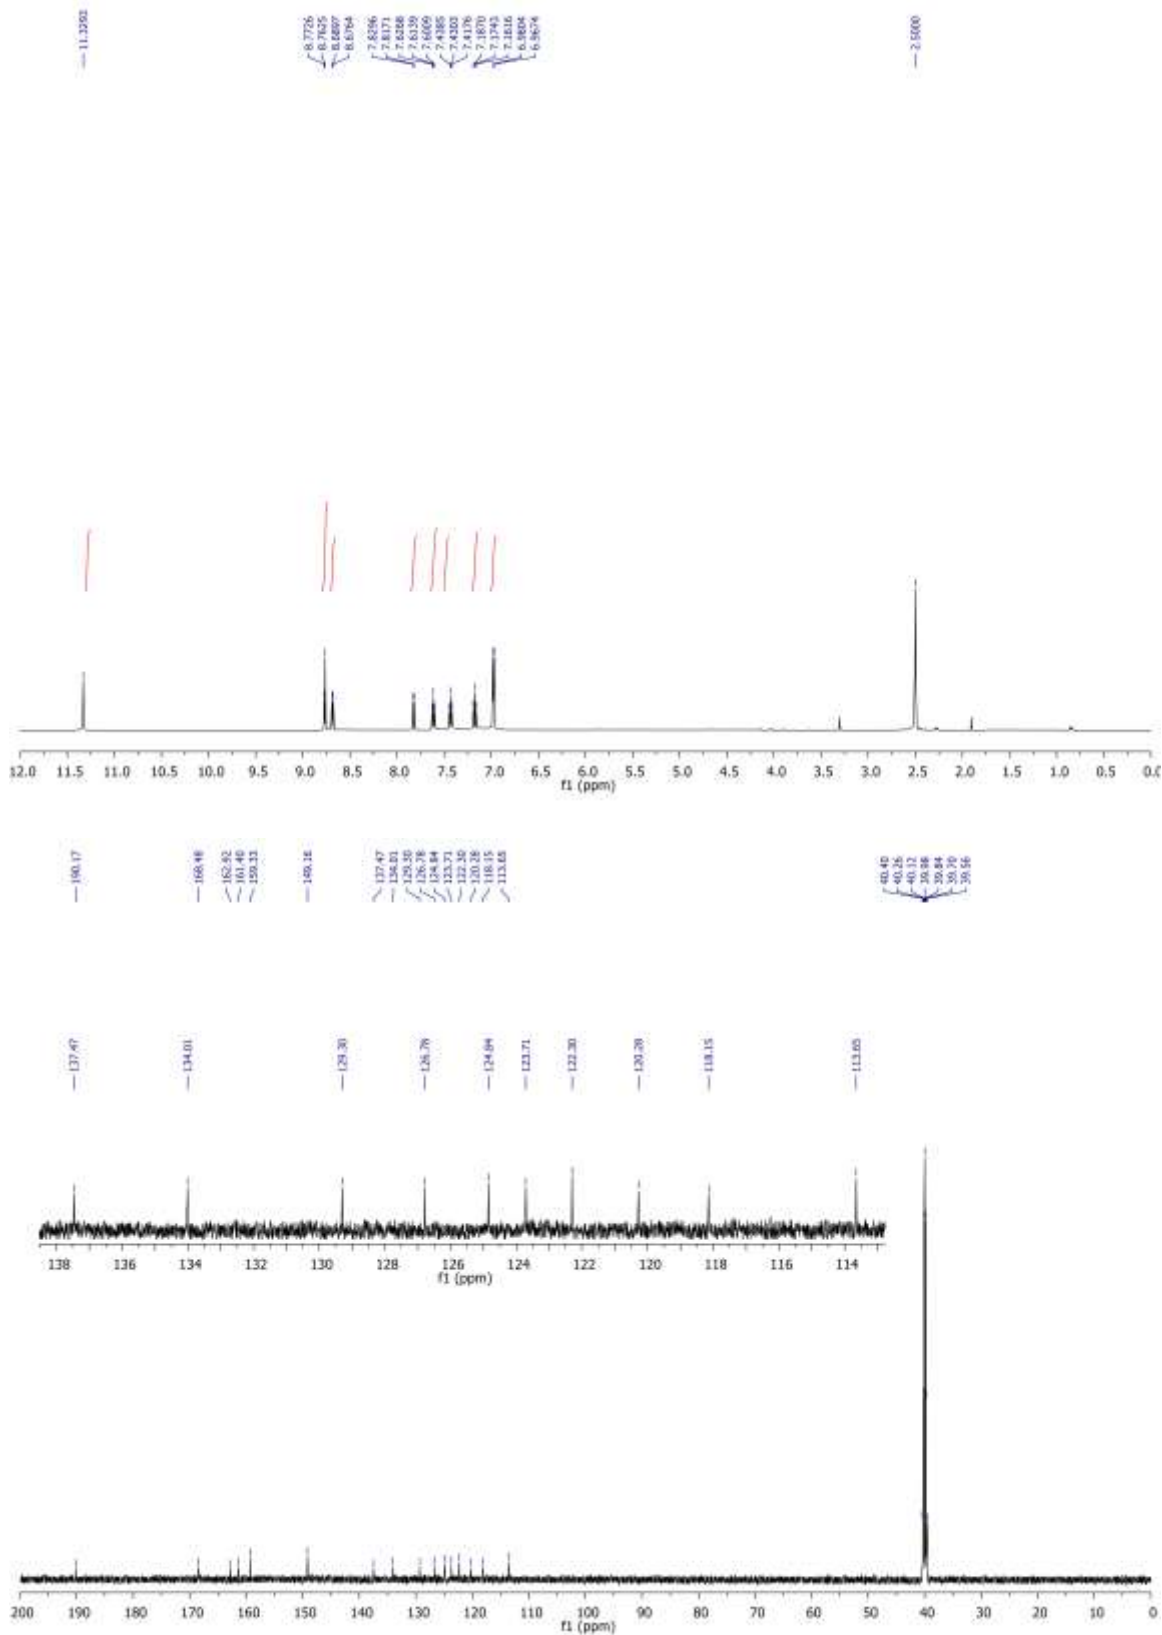

**Fig. S16.** <sup>1</sup>H-NMR (600 MHz) and <sup>13</sup>C-NMR (150 MHz) spectrums of **5g** in DMSO-d<sub>6</sub>.

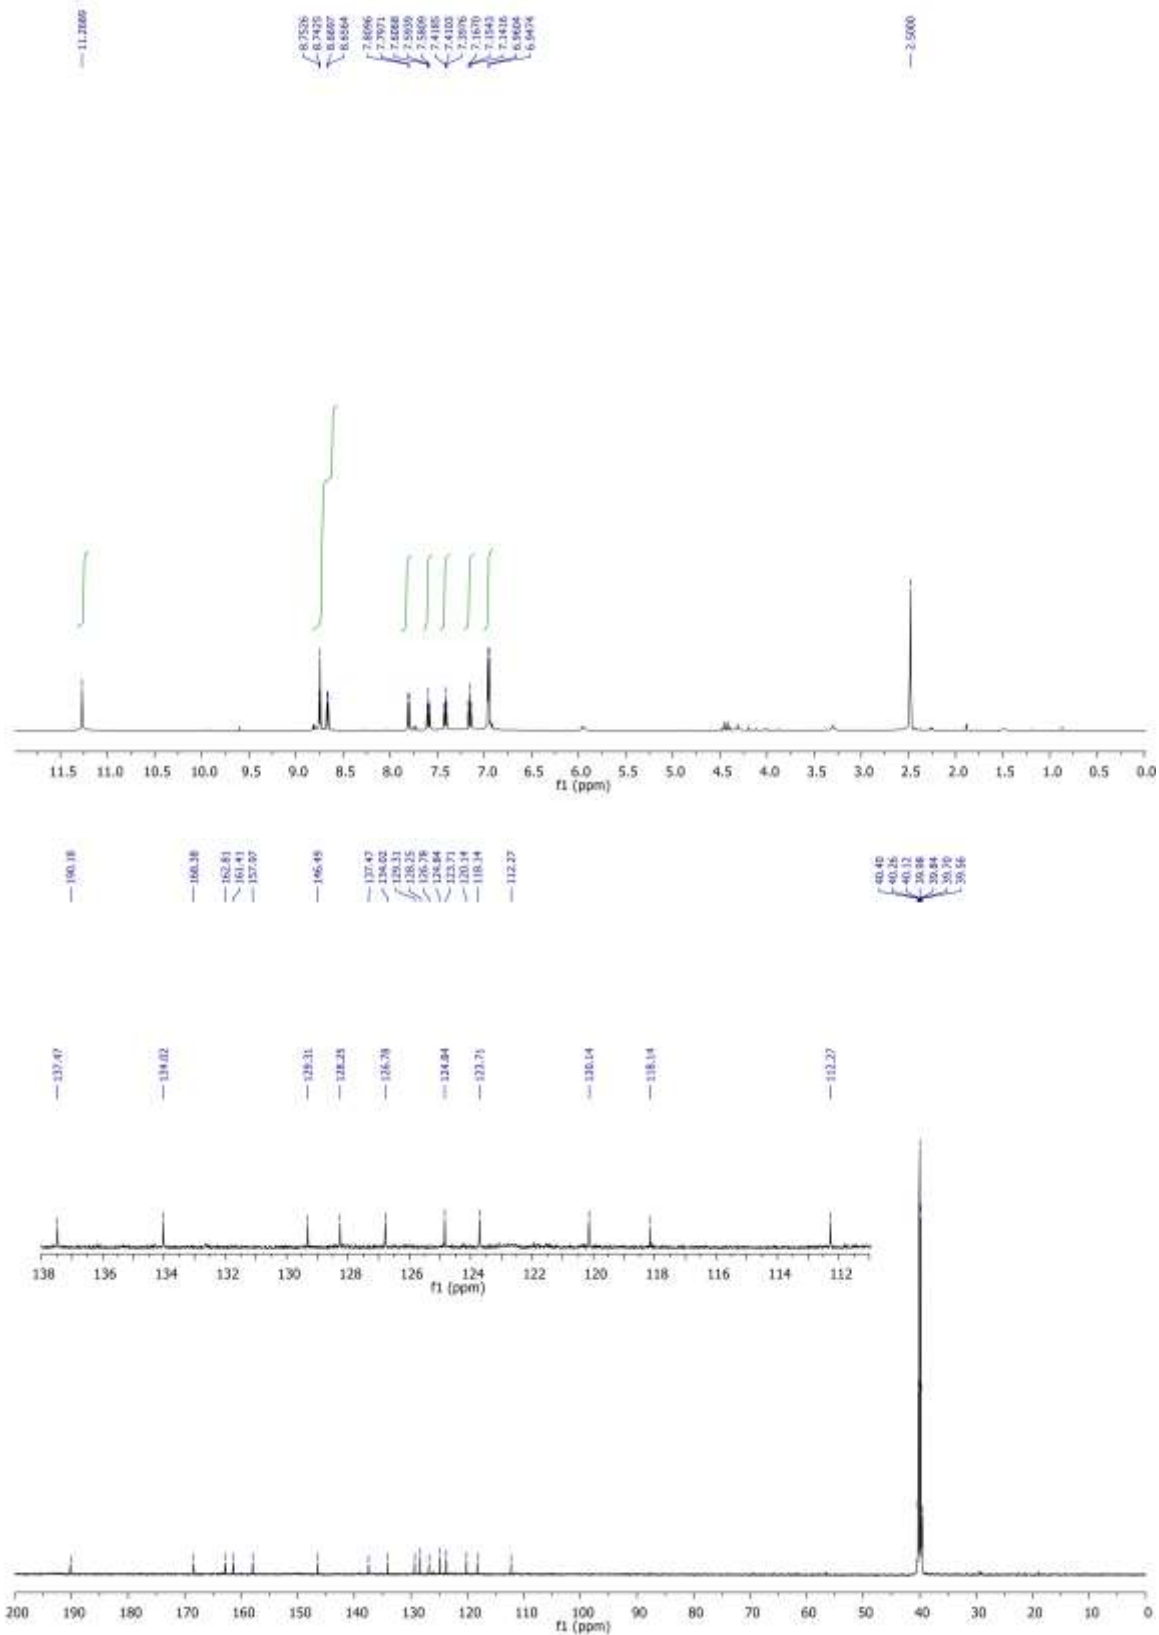

**Fig. S17.** <sup>1</sup>H-NMR (600 MHz) and <sup>13</sup>C-NMR (150 MHz) spectrums of **5h** in DMSO-d<sub>6</sub>.
